# Supplementary material
Source: MDPI journal article supplement (https://www.mdpi.com/2073-4344/7/12/372)

# Supplementary Materials: Influence of the Nanostructure of Gallium Oxide Catalysts on Conversion in the Green Synthesis of Carbamates

Javishk Shah <sup>1</sup>, Paul Ratnasamy <sup>2</sup> and Maria L. Carreon <sup>1,\*</sup>

<sup>1</sup> Chemical Engineering Department, University of Tulsa, 800 South Tucker Drive, Tulsa, OK 74104-9700, USA; jrs943@utulsa.edu

<sup>2</sup> Lalit, Gulmohar Park, Pune 411007, India; paulratnasamy@gmail.com

\* Correspondence: maria-carreon@utulsa.edu; Tel.: +1-918-631-2424

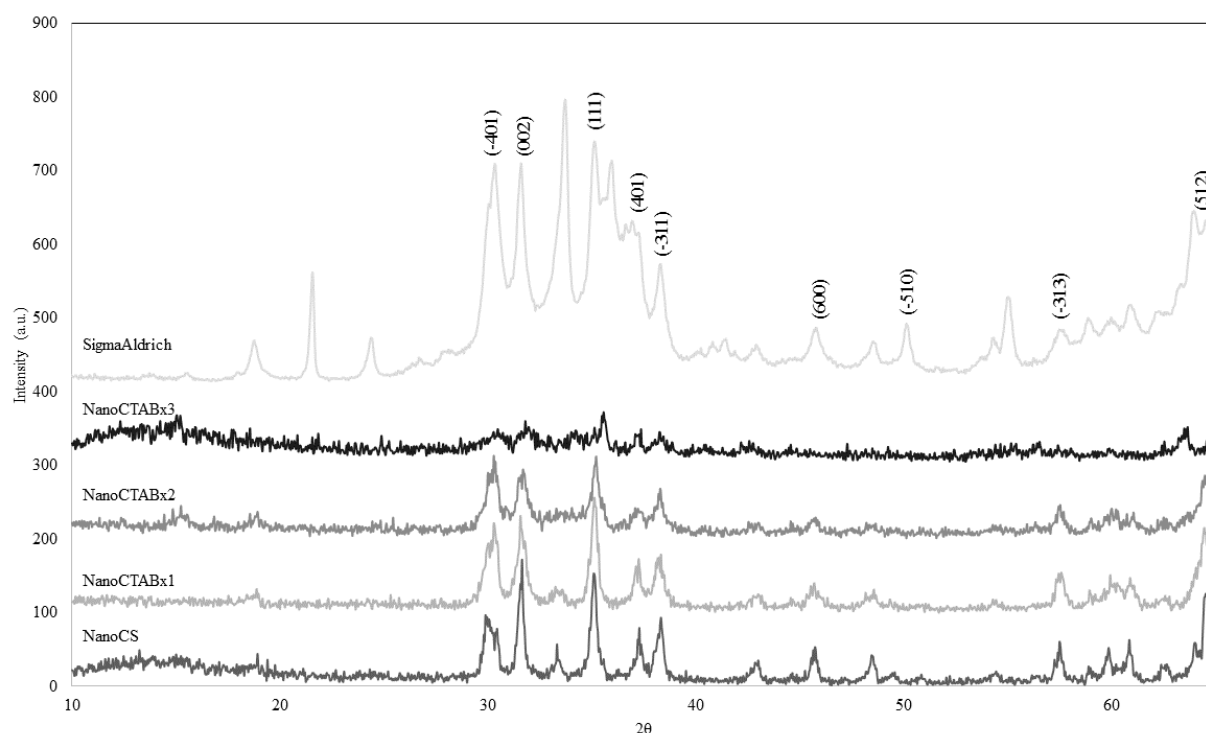

**Figure S1.** XRD patterns of gallium oxide catalysts employed for the studied reaction.

**Table S1.** Relative crystallinity of the studied catalysts and their corresponding selectivity to carbamate.

| Catalyst                                     | Relative Crystallinity | Conversion (%) |
|----------------------------------------------|------------------------|----------------|
| Ga <sub>2</sub> O <sub>3</sub> -SigmaAldrich | 100                    | 6.8            |
| Nano Sample (1:1.6:740)                      | 21.39                  | 7.6            |
| Nano Sample (1:3.2:740)                      | 15.98                  | 17.9           |
| Nano Sample (1:4.8:740)                      | 9.93                   | 23.5           |
| Nano Sample (1:0:740)                        | 23.74                  | 13.3           |

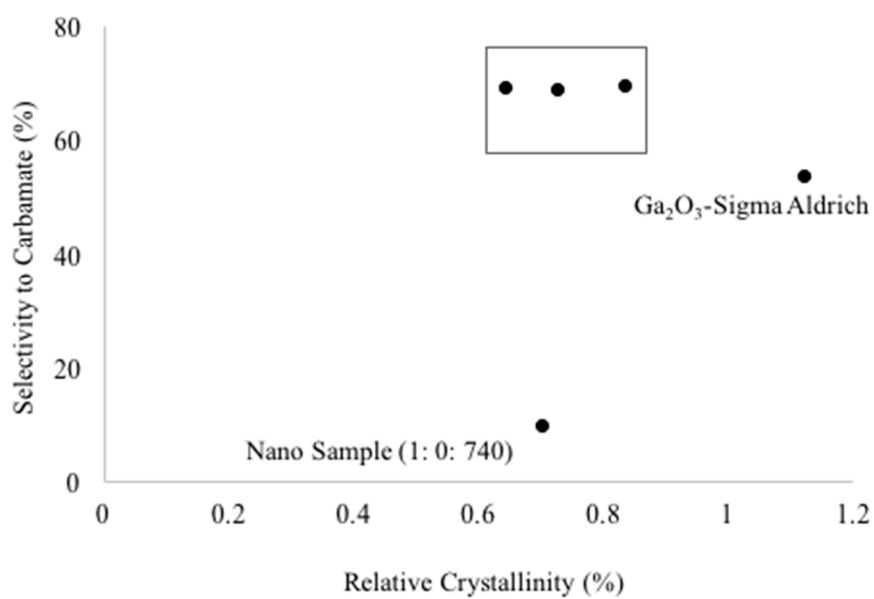

**Figure S2.** Carbamate selectivity a function of relative crystallinity.

© 2017 by the authors. Submitted for possible open access publication under the terms and conditions of the Creative Commons Attribution (CC BY) license (<http://creativecommons.org/licenses/by/4.0/>).

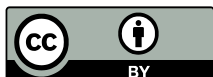

Supplement: s1 [file s1]
